# Supplementary material for: Development of rapid hypoxia-detectable artificial oxygen carriers with a core–shell structure and erythrocyte mimetic shape
Source: Royal Society of Chemistry journal article supplement (doi:10.1039/d3ma01135f), 2024-01-01
Supplement: d3ma01135f1.pdf [file d3ma01135f1.pdf]

### Development of rapid hypoxia-detectable artificial oxygen carriers with core-shell structure and erythrocyte mimetic shape

Zhang Qiming, Natsuko F Inagaki, Yusuke Hirabayashi, Masamichi Kamihira, and Taichi Ito

| Name                                                       | Value                | Unit                   | Source       |
|------------------------------------------------------------|----------------------|------------------------|--------------|
| Radius of core, $R_1$                                      | 2                    | $\mu\text{m}$          | Specified    |
| Shell thickness, $R_2$                                     | 2                    | $\mu\text{m}$          | Specified    |
| O <sub>2</sub> Diffusivity in the PFOB core, $D_1$         | $5.6 \times 10^{-5}$ | $\text{cm}^2/\text{s}$ | <sup>1</sup> |
| O <sub>2</sub> Diffusivity in the PDMS shell, $D_2$        | $3.4 \times 10^{-5}$ | $\text{cm}^2/\text{s}$ | <sup>2</sup> |
| O <sub>2</sub> Diffusivity in culture medium, $D_3$        | $2.4 \times 10^{-5}$ | $\text{cm}^2/\text{s}$ | <sup>3</sup> |
| O <sub>2</sub> Solubility in PFOB (1 atm), $S_1$           | 21135                | $\mu\text{M}$          | <sup>1</sup> |
| O <sub>2</sub> Solubility in PDMS (1 atm), $S_2$           | 8035                 | $\mu\text{M}$          | <sup>4</sup> |
| O <sub>2</sub> Solubility in culture medium (1 atm), $S_3$ | 1056                 | $\mu\text{M}$          | <sup>5</sup> |
| Temperature, $T$                                           | 37                   | $^\circ\text{C}$       | Specified    |
| Pressure, $P$                                              | 1                    | atm                    | Specified    |

Table. S1 Parameters used in the simulation of oxygen transfer within cDFC

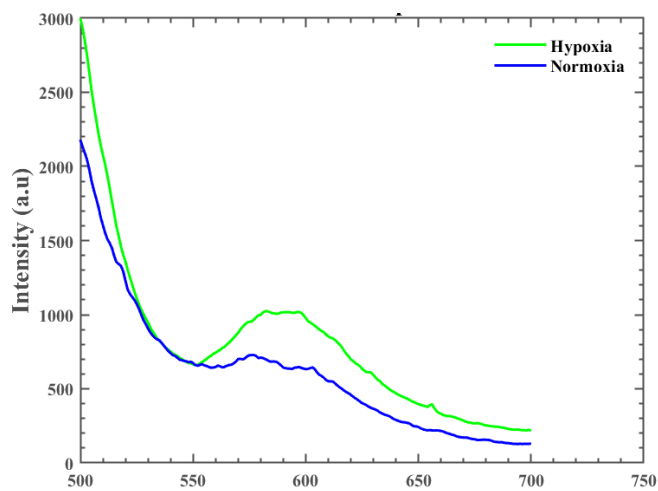

Fig. S1 Phosphorescence response intensity map of Ru(dpp)@ PFOB/PDMS-TPE; Blue: normoxia (20% O<sub>2</sub>), Green: hypoxia (0% O<sub>2</sub>)

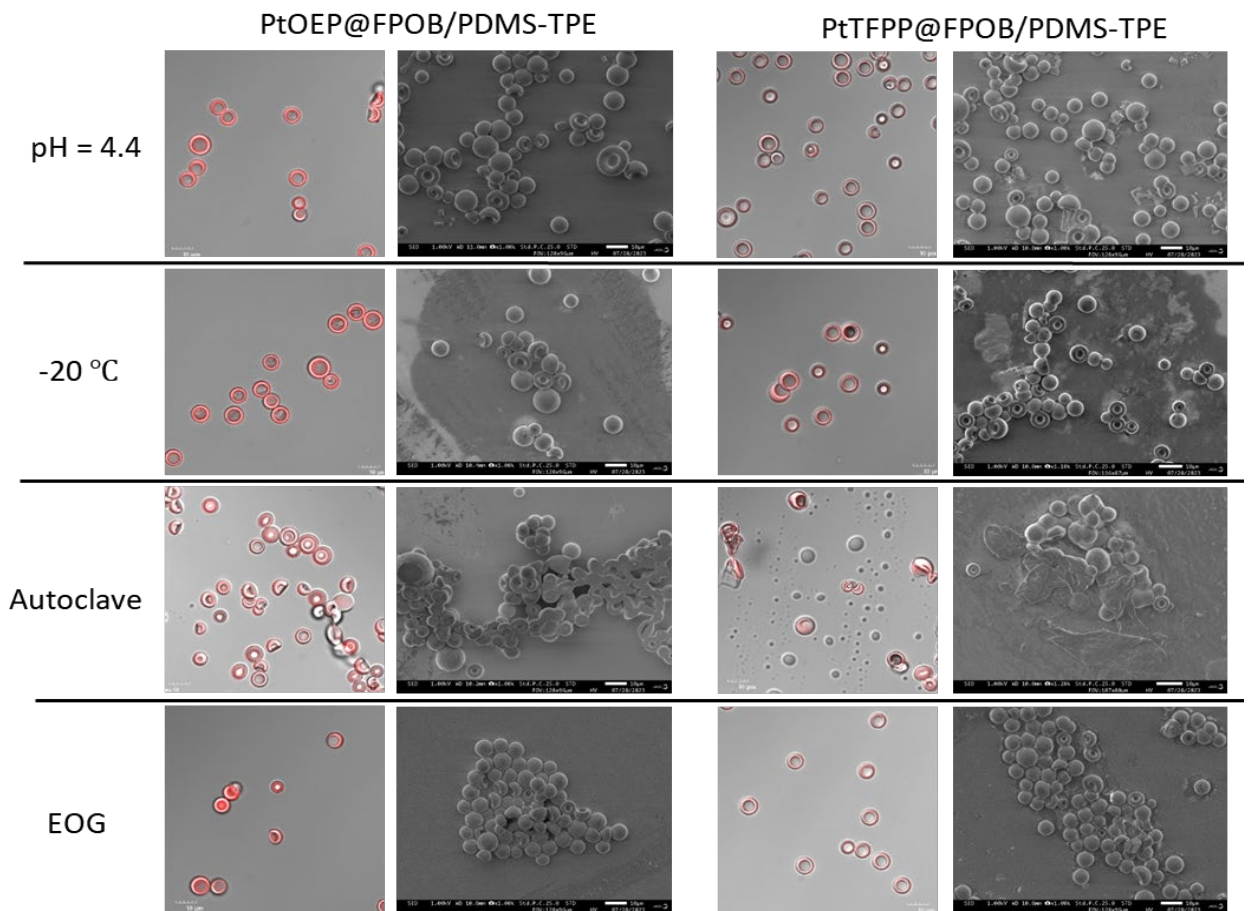

Fig. S2. Confocal and SEM images of bifunctional cDFCs after treatments such as low pH (pH=4.4) incultation, low temperature (-20°C) incubation, autoclave, and EOG sterilization;

Scale bar = 10  $\mu$ m

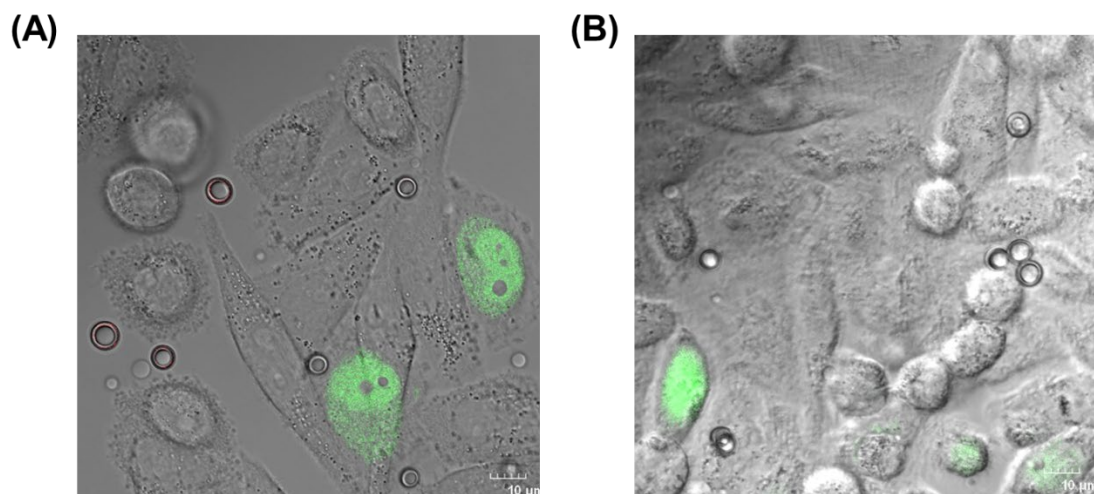

Fig. S3 Merged channels confocal images of bifunctional cDFCs dispersed with Hr-HeLa cells under normoxia condition; (A) PtOEP@PFOB/PDMS-TPE; (B): PtTFPP@PFOB/PDMS-TPE; Green channel: ex = 488 nm;

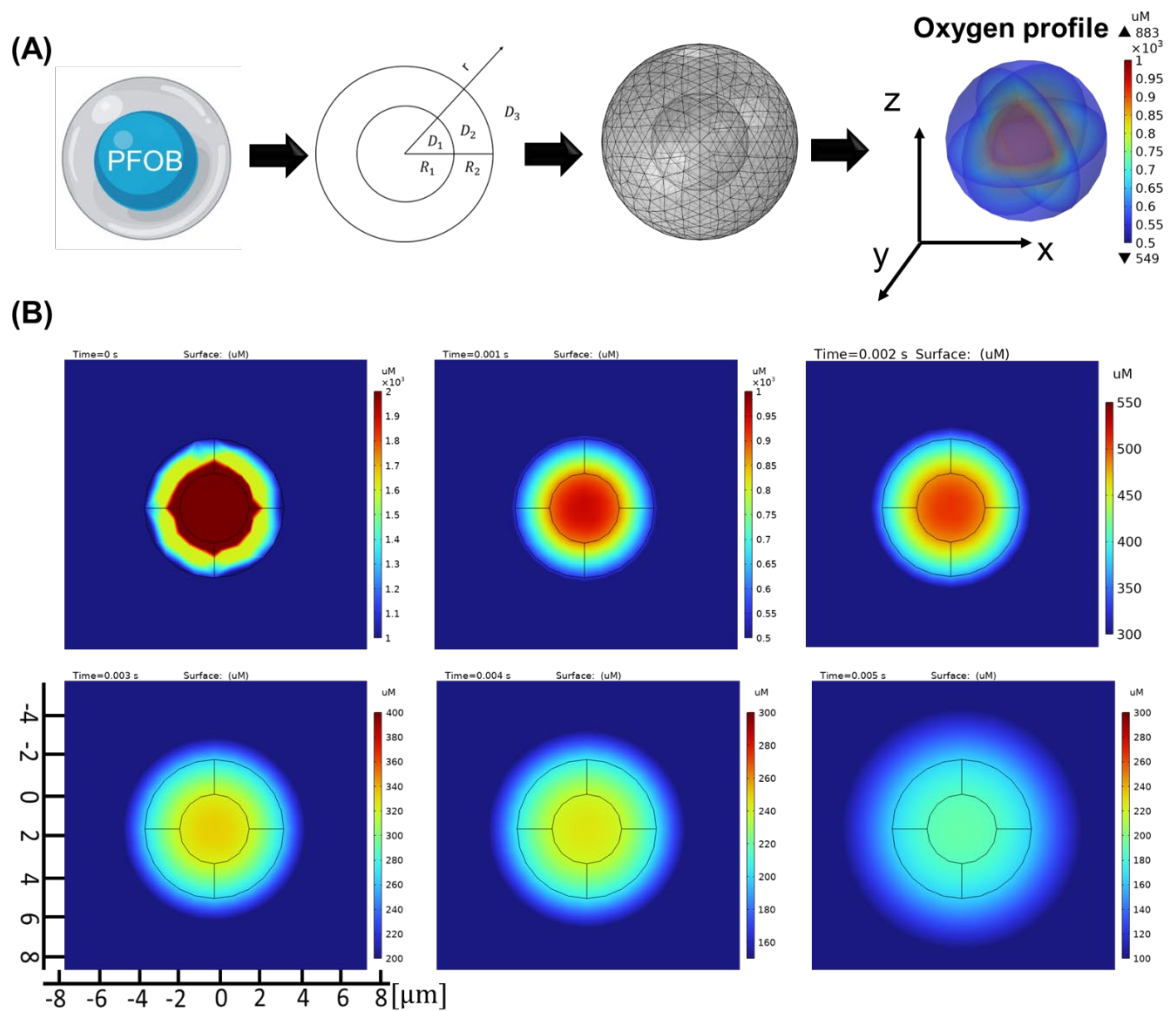

Fig. S4 Simulation of oxygen release from the PFOB/PDMS–TPE spherical microparticle

(A) Built-up of spherical core-shell particle model,  $R_1$  represents for the radius of PFOB core,  $R_2$  represents for the shell thickness;  $D_1$ ,  $D_2$ , and  $D_3$  represent the oxygen diffusivity in PFOB, PDMS–TPE, and culture medium, respectively;

(B) Simulated results of 2D oxygen diffusion profile from 0 ms to 5 ms

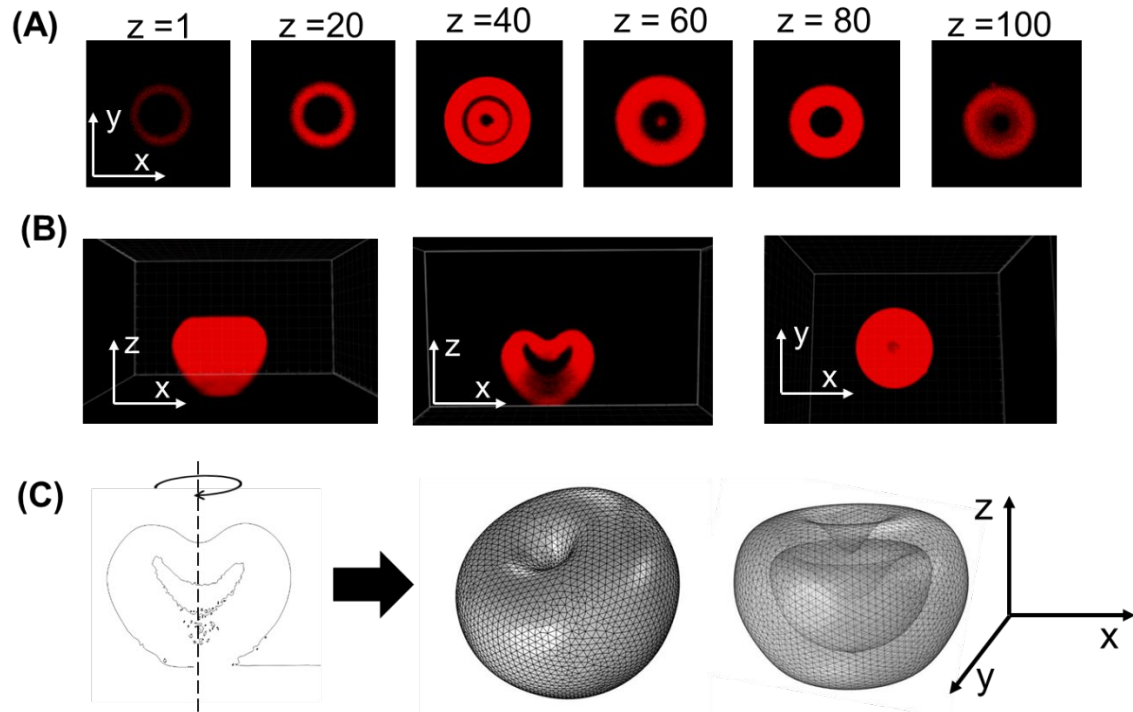

Fig. S5. Construction of cDFC 3D model by importing 2D confocal image stacks into COMSOL by using Imaris. (A) Selected confocal images of a cDFC at different z positions; (B) Reconstructed 3D confocal image of cDFC by Imaris. Left: Front view. Middle: Cross-section of front Right: Top view; (C) Import of cDFC cross-section into COMSOL and output the 3D geometry Overview of 3D mesh cDFC geometry in COMSOL. Left: 2D imported contour from Imaris image. Right: overview and transparent view of cDFC 3D mesh after revolution;

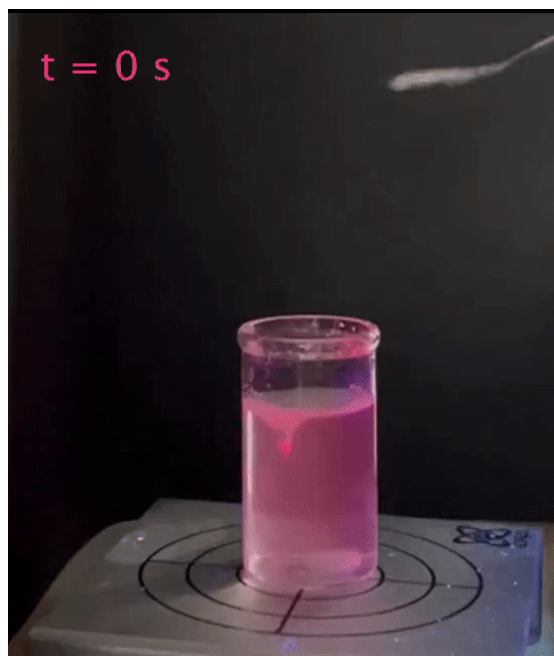

Fig. S6. Movie (GIF) of the hypoxia response of suspension containing 1 vol% of PtOEP@PDMS-TPE in water after the addition of  $\text{Na}_2\text{SO}_3$ . Phosphorescence rapidly appeared with UV irradiation at 365 nm after the addition of  $\text{Na}_2\text{SO}_3$ .

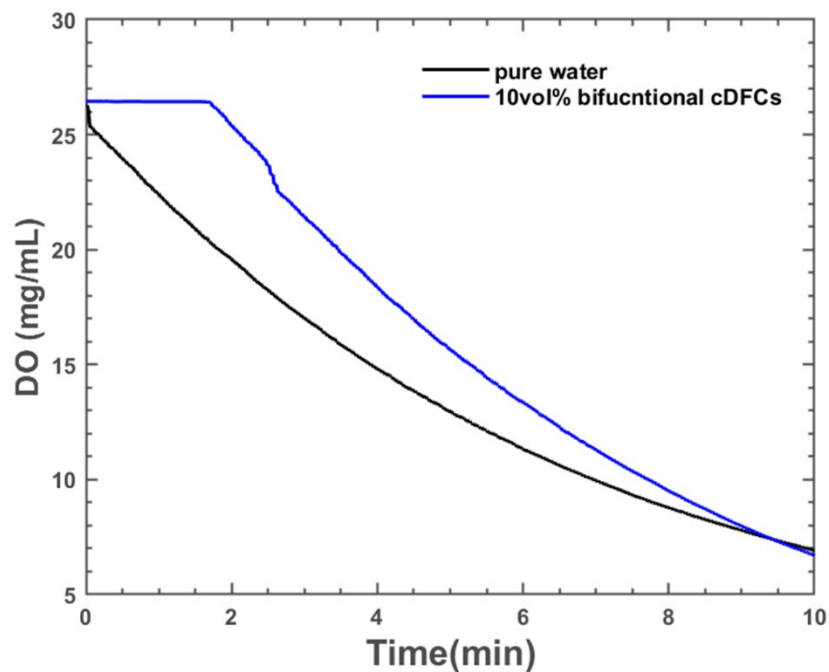

**Fig. S7.** Oxygen releasing curves of water (black) and 10 vol% bifunctional cDFC suspension (blue). The suspension was first perfused with pure oxygen at 100 mL/min until the saturated. Then nitrogen gas was perfused into the suspension at the same speed. The dissolved oxygen (DO) concentration decrease was monitored by a DO meter at real time.

## Reference

- 1 J. Jägers, A. Wrobeln and K. B. Ferenz, *Pflugers Arch*, 2021, **473**, 139–150.
- 2 D. A. Markov, E. M. Lillie, S. P. Garbett and L. J. McCawley, *Biomed Microdevices*, 2014, **16**, 91–96.



- 3 A. Al-Ani, D. Toms, D. Kondro, J. Thundathil, Y. Yu and M. Ungrin, *PLoS One*, 2018, **13**, e0204269.
- 4 L. Xu, H. Lee, D. Jetta and K. W. Oh, *Lab Chip*, 2015, **15**, 3962–3979.
- 5 D. Newby, L. Marks and F. Lyall, *Placenta*, 2005, **26**, 353–357.
